# Supplementary material for: Controllable confinement nano-reinforced organic–inorganic cyanate ester resins with optimal modulus and dielectric properties trade-offs
Source: Royal Society of Chemistry journal article supplement (doi:10.1039/d4py00481g), 2024-01-01
Supplement: d4py00481g1.pdf [file d4py00481g1.pdf]

## Supporting Information

### **Controllable confinement nano-reinforced organic-inorganic cyanate ester resin with optimal modulus and dielectric properties trade-offs**

*Yushan Wu<sup>a</sup>, Yu Xiang<sup>a</sup>, Hantian Lu<sup>a</sup>, Faxiang Qin<sup>a</sup>, Peng Xu<sup>a,\*</sup>, Hua-Xin Peng<sup>a,b</sup>*

*<sup>a</sup>Institute for Composites Science Innovation (InCSI), School of Materials Science and Engineering, Zhejiang University, 866 Yuhangtang Road, Hangzhou, 310027, PR China*

*<sup>b</sup>MOE Key Laboratory of Macromolecular Synthesis and Functionalization, Zhejiang University, 866 Yuhangtang Road, Hangzhou, 310027, PR China*

*\* Corresponding authors: Peng Xu (pengxu@zju.edu.cn)*

## S1. Experimental

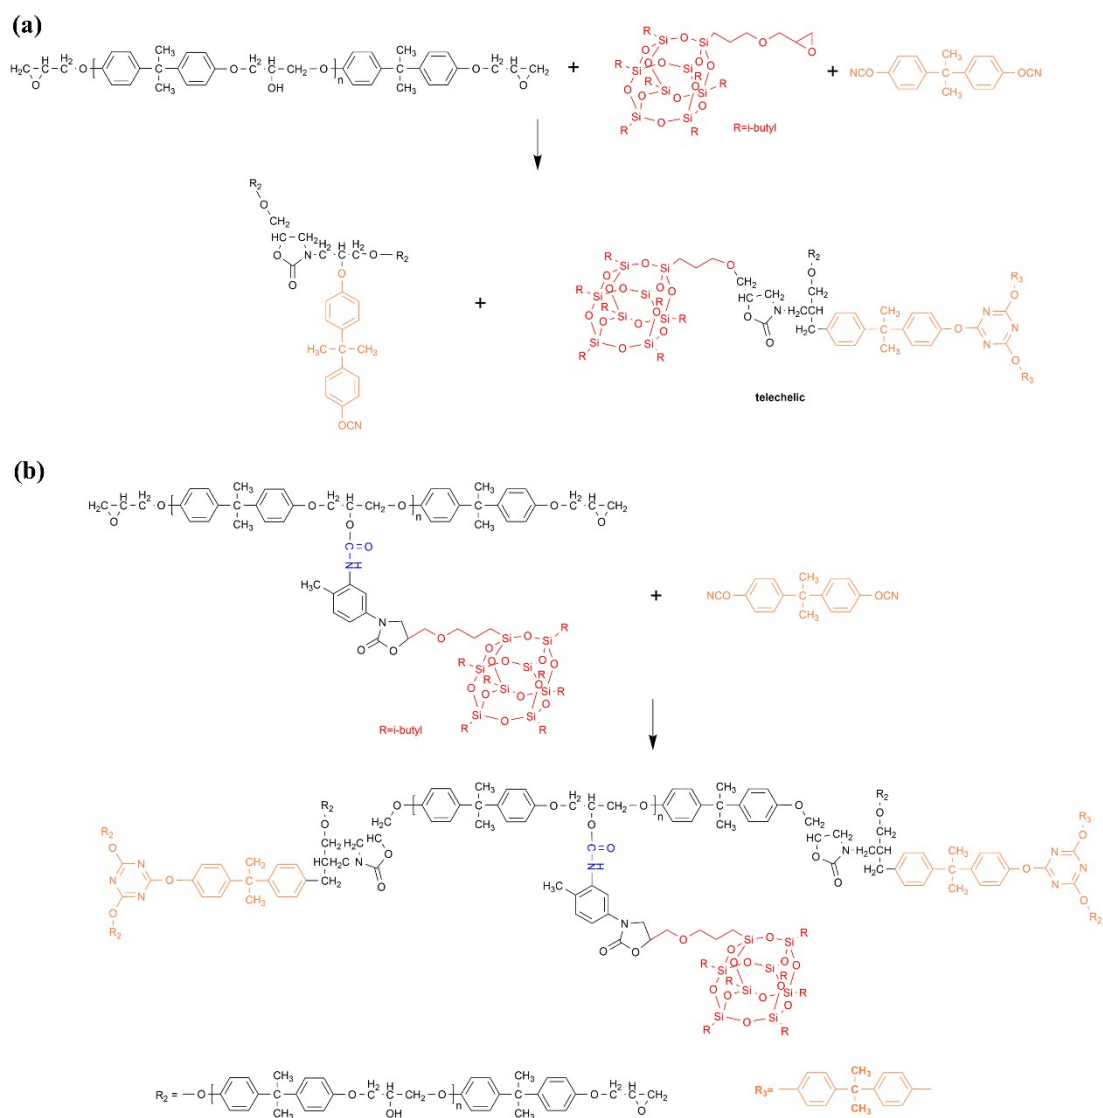

**Fig. S1.** Reaction mechanism of preparation of (a)TCEP; (b) PCEP.

## S2. Results and discussion

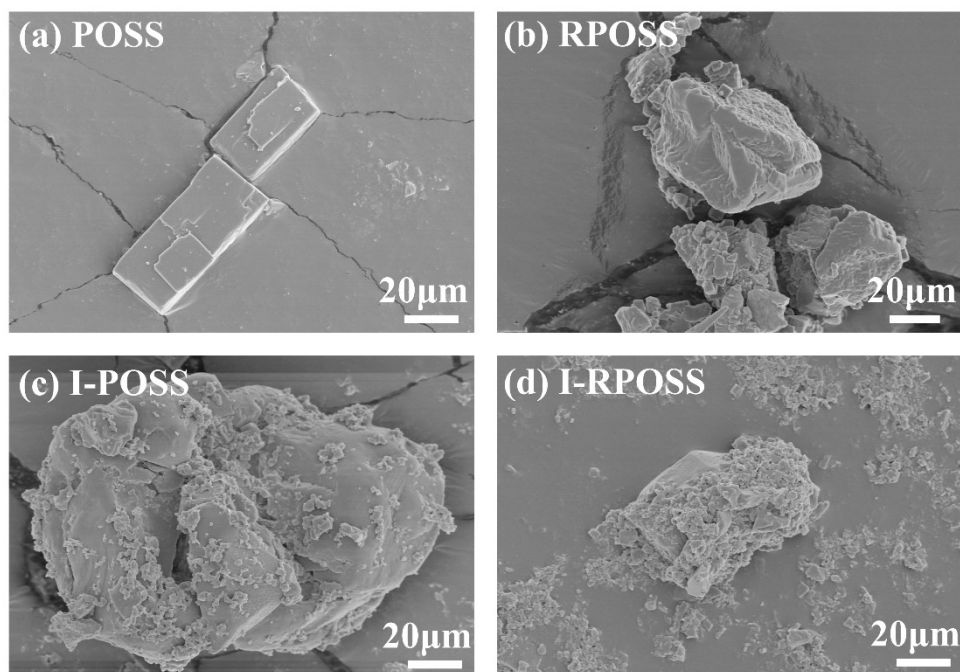

**Fig. S2.** SEM micrographs showing particle morphology of (a) POSS, (b) RPOSS, (c) I-POSS and (d) I-RPOSS.

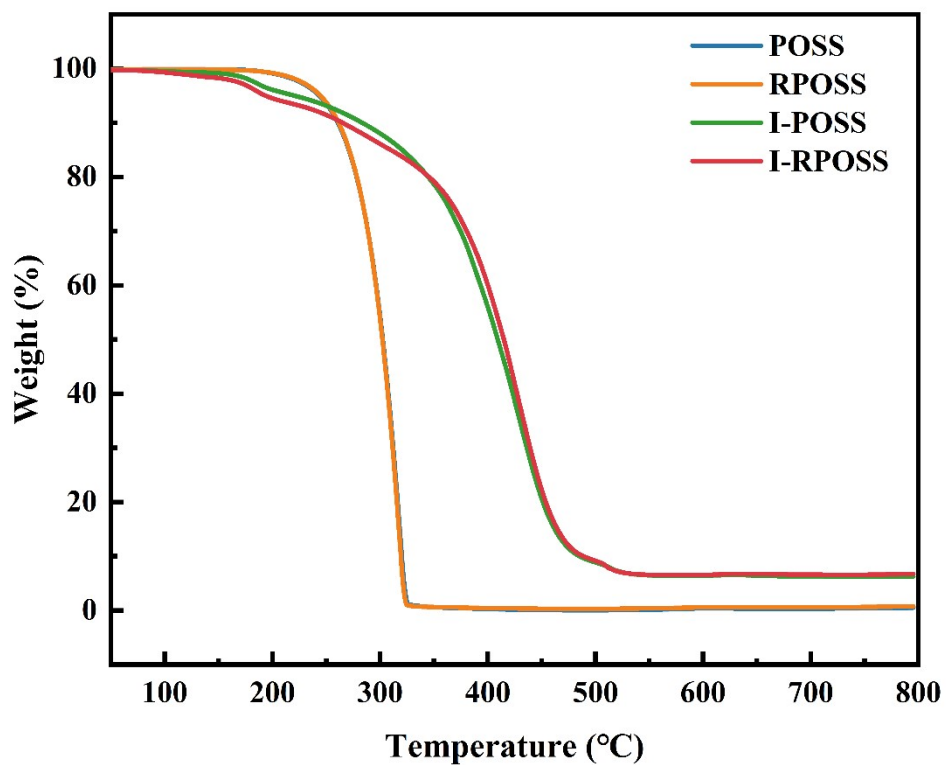

**Fig. S3.** TGA curves of POSS, RPOSS, I-POSS, I-RPOSS.

**Table S1** The comprehensive properties of the CE/EP, nanofillers modified CE.

| Modified systems        | Tensile modulus (MPa)      | Tensile strength (MPa) | T <sub>g</sub> (°C) | Dielectric constant ( $\epsilon$ ) | Dielectric loss ( $\tan\delta$ ) | Ref.           |           |
|-------------------------|----------------------------|------------------------|---------------------|------------------------------------|----------------------------------|----------------|-----------|
| Pure CE/EP              | 3413                       | 68.11                  | 250.4               | 3.34 (1 MHz)                       | 0.012 (1 MHz)                    | -              |           |
| Nanofillers modified CE | I-RPOSS/CE/EP              | 4033                   | 63.99               | 271.2                              | 3.27 (1 MHz)                     | 0.0081 (1 MHz) | this work |
|                         | MWCNT/BECy/DGEBF           | 3356                   | 91.25               | -                                  | -                                | -              | [1]       |
|                         | POSS/Cy-OCN/DGEBA          | 3176                   | 78.40               | 255.0                              | 2.27 (1 MHz)                     | 0.0033 (1 MHz) | [2]       |
|                         | [HPyr][BF4]/DCBE           | 3074                   | 65.40               | 217.0                              | -                                | -              | [3]       |
|                         | MoS <sub>2</sub> /BECy/PSF | 3632                   | 65.70               | -                                  | 2.87 (10 GHz)                    | 0.0106(10 GHz) | [4]       |
|                         | MMT/BADCy                  | 3450                   | 10.80               | 264.5                              | -                                | -              | [5]       |
| MWCNT/BECy              | 2914                       | 64.00                  | -                   | -                                  | -                                | [6]            |           |

## Reference

- 1 J. W. Li, Z. X. Wu, C. J. Huang, H. M. Liu, R. J. Huang, L. F. Li, Mechanical properties of cyanate ester/epoxy nanocomposites modified with plasma functionalized MWCNTs, *Compos. Sci. Technol.*, 2014, **90**, 166-173.
- 2 A. Chandramohan, K. Dinkaran, A. A. Kumar, M. Alagar, Synthesis and characterization of epoxy modified cyanate ester POSS nanocomposites, *High Perform. Polym.*, 2012, **24** (5), 405-417.
- 3 A. Vashchuk, A. R. de Anda, O. Starostenko, O. Grigoryeva, P. Sotta, S. Rogalsky, P. Smertenko, A. Fainleib, D. Grande, Structure–Property relationships in nanocomposites based on cyanate ester resins and 1-heptyl pyridinium tetrafluoroborate ionic liquid, *Polymer*, 2018, **148**, 14-26.
- 4 M. Zhao, L. Z. Liu, B. Zhang, M. M. Sun, X. G. Zhang, X. Zhang, J. H. Li, L. Wang, Effect of surface functionalization of molybdenum disulfide nanosheets with polysulfone on cyanate ester nanocomposites, *Colloids Surf. A*, 2020, **589**, 124476.
- 5 G. I. Anthoulis, E. Kontou, A. Fainleib, I. Bei, Y. Gomza, Synthesis and characterization of polycyanurate/montmorillonite nanocomposites, *J. Polym. Sci. Pol. Phys.*, 2008, **46** (11), 1036-1049.
- 6 P. Subba Rao, K. Renji, M. R. Bhat, D. R. Mahapatra, G. Narayana Naik, Mechanical properties of CNT–Bisphenol E cyanate ester-based CFRP nanocomposite developed through VARTM process, *J. Reinf. Plast. Comp.*, 2015, **34** (12), 1000-1014.
